# Supplementary material for: Characterization and Genomic Analysis of a New Phage Infecting Helicobacter pylori
Source: MDPI journal article supplement (doi:10.3390/ijms23147885), 2022-07-17
Supplement: s1 [file s1]

**Table S1.** Genomic features HPy1R phage.

| ORF | Start (bp) | End (bp) | Size (aa) | MW (kDa) | pI    | Product                             | Blastp                                                                                 | E-value (% identify)            | Signals/Motifs |
|-----|------------|----------|-----------|----------|-------|-------------------------------------|----------------------------------------------------------------------------------------|---------------------------------|----------------|
| 1   | 256        | 588      | 110       | 12.33    | 11    | Hypothetical protein                | hypothetical protein [Helicobacter phage Pt4481G]                                      | $2.00 \times 10^{-68}$ (94.55%) | -              |
| 2   | 591        | 722      | 42        | 4.85     | 10.83 | Hypothetical protein                | hypothetical protein [Helicobacter phage Pt1293U]                                      | $5.00 \times 10^{-21}$ (92.86%) | 1 TMD          |
| 3   | 791        | 1897     | 392       | 46.04    | 10.55 | Integrase                           | integrase [Helicobacter phage Pt22899G]                                                | 0 (93.16%)                      | -              |
| 4   | 1924       | 2079     | 51        | 6.07     | 10.4  | Hypothetical protein                | hypothetical protein [Helicobacter phage Pt1918U]                                      | $2.00 \times 10^{-26}$ (92.00%) | -              |
| 5   | 2081       | 2389     | 102       | 11.84    | 9.95  | Transcriptional regulator           | hypothetical protein [Helicobacter phage Pt5771G]                                      | $1.00 \times 10^{-53}$ (86.27%) | -              |
| 6   | 2386       | 3345     | 319       | 37.27    | 8.92  | Helix-turn-helix domain             | helix-turn-helix domain-containing protein [Helicobacter phage phiHP33]                | 0 (79.94%)                      | -              |
| 7   | 3355       | 3711     | 118       | 14.17    | 11.16 | Hypothetical protein                | putative ABC binding cassette transporter [Helicobacter phage Pt21299RU]               | $2.00 \times 10^{-73}$ (91.53%) | -              |
| 8   | 3683       | 3808     | 41        | 4.98     | 10.4  | DNA helicase                        | DNA helicase [Helicobacter phage Pt1846U]                                              | $2.00 \times 10^{-19}$ (95.12%) | 1 TMD          |
| 9   | 3818       | 4987     | 389       | 45.54    | 6.8   | Replicative DNA helicase atpase     | replicative DNA helicase [Helicobacter phage COL 5-PUJ]                                | 0 (94.34%)                      | -              |
| 10  | 4984       | 6555     | 523       | 60.97    | 9.14  | DNA primase                         | DNA primase [Helicobacter phage Pt21299RU]                                             | 0 (93.68%)                      | -              |
| 11  | 6567       | 8186     | 539       | 62.32    | 9.69  | Exonuclease                         | exonuclease [Helicobacter phage Pt4497U]                                               | 0 (86.09%)                      | -              |
| 12  | 8253       | 13526    | 1757      | 199.59   | 8.8   | Ddrb-parb domain-containing protein | putative crystallin beta/gamma motif-containing protein [Helicobacter phage Pt21299RU] | 0 (92.49%)                      | -              |
| 13  | 13592      | 14869    | 425       | 48.14    | 4.93  | Tail fiber protein                  | tail fiber protein [Helicobacter phage SwA626G]                                        | 0 (78.64%)                      | -              |

|    |       |       |     |       |       |                       |                                                                |                                     |       |
|----|-------|-------|-----|-------|-------|-----------------------|----------------------------------------------------------------|-------------------------------------|-------|
| 14 | 14873 | 15427 | 184 | 20.83 | 6.28  | Tail fiber protein    | putative tail fiber protein [Helicobacter phage PtB92G]        | $7.00 \times 10^{-107}$<br>(80.87%) | -     |
| 15 | 15424 | 15819 | 131 | 15.04 | 9.12  | Tail assembly protein | putative tail assembly protein [Helicobacter phage SwA626G]    | $6.00 \times 10^{-88}$<br>(93.89%)  | 1 TMD |
| 16 | 15816 | 16220 | 134 | 15.76 | 9.26  | Hypothetical protein  | hypothetical protein [Helicobacter phage DeM53M]               | $1.00 \times 10^{-82}$<br>(88.81%)  | -     |
| 17 | 16217 | 16804 | 195 | 22.39 | 4.75  | Histidine kinase      | putative histidine kinase [Helicobacter phage Pt21299RU]       | $7.00 \times 10^{-128}$<br>(94.36%) | -     |
| 18 | 17045 | 17599 | 184 | 21.59 | 4.41  | Structural protein    | hypothetical protein [Helicobacter phage Pt1293U]              | $1.00 \times 10^{-125}$<br>(96.20%) | -     |
| 19 | 17611 | 18738 | 375 | 41.53 | 8.38  | Major capsid protein  | DUF4043 family protein [Helicobacter phage phiHP33]            | 0<br>(96.00%)                       | -     |
| 20 | 18755 | 19129 | 124 | 13.42 | 7.5   | Structural protein    | hypothetical protein phiHP33_gp18 [Helicobacter phage phiHP33] | $2.00 \times 10^{-72}$<br>(87.9 %)  | -     |
| 21 | 19389 | 19832 | 147 | 16.42 | 9.98  | Structural protein    | hypothetical protein [Helicobacter phage Pt5771G]              | $2.00 \times 10^{-81}$<br>(95.24%)  | 1 TMD |
| 22 | 19898 | 21709 | 603 | 69.52 | 5.07  | Portal protein        | portal protein [Helicobacter phage Pt22899G]                   | 0<br>(95.69%)                       | -     |
| 23 | 21824 | 23380 | 518 | 60.64 | 8.43  | Terminase             | putative terminase [Helicobacter phage Pt22899G]               | 0<br>(94.59 %)                      | -     |
| 24 | 23448 | 23651 | 67  | 8.01  | 10.89 | Hypothetical protein  | hypothetical protein [Helicobacter phage Pt22899G]             | $1.00 \times 10^{-32}$<br>(90.91%)  | 1 TMD |
| 25 | 23663 | 23899 | 78  | 9.12  | 4.89  | Hypothetical protein  | hypothetical protein [Helicobacter phage Pt22899G]             | $2.00 \times 10^{-34}$<br>(79.49%)  | 1 TMD |
| 26 | 23901 | 24224 | 107 | 12.02 | 8.43  | Holin                 | putative holin [Helicobacter phage Pt22899G]                   | $3.00 \times 10^{-66}$<br>(88.79%)  | 2 TMD |
| 27 | 24226 | 25221 | 331 | 37.87 | 4.89  | Structural protein    | hypothetical protein [Helicobacter phage Pt5322G]              | 0<br>(85.2 %)                       | -     |
| 28 | 25218 | 25436 | 72  | 8.39  | 7.85  | Hypothetical protein  | hypothetical protein [Helicobacter phage Pt5322G]              | $2.00 \times 10^{-44}$<br>(94.44 %) | 1 SP  |

|    |       |       |     |       |       |                                    |                                                                         |                                      |       |
|----|-------|-------|-----|-------|-------|------------------------------------|-------------------------------------------------------------------------|--------------------------------------|-------|
| 29 | 25485 | 26030 | 181 | 20.9  | 7.61  | Structural protein                 | hypothetical protein [Helicobacter phage Pt22899G]                      | $2.00 \times 10^{-129}$<br>(95.58%)  | -     |
| 30 | 26032 | 26829 | 265 | 29.58 | 7.27  | Structural protein                 | hypothetical protein [Helicobacter phage UKEN31U]                       | $5.00 \times 10^{-178}$<br>(93.58 %) | -     |
| 31 | 26829 | 27392 | 187 | 21.22 | 10.29 | Hypothetical protein               | hypothetical protein [Helicobacter phage Pt1293U]                       | $2.00 \times 10^{-124}$<br>(91.44%)  | -     |
| 32 | 27396 | 27722 | 108 | 12.48 | 10.3  | Hypothetical protein               | hypothetical protein [Helicobacter phage Pt22899G]                      | $1.00 \times 10^{-71}$<br>(97.22%)   | 1 TMD |
| 33 | 27750 | 28667 | 305 | 35.26 | 5.71  | Mitogen-activated protein kinase 1 | mitogen-activated protein kinase 1 [Helicobacter phage SwA626G]         | $9.00 \times 10^{-171}$<br>(85.32%)  | 1 TMD |
| 34 | 28683 | 29549 | 288 | 32.69 | 9.41  | Structural protein                 | hypothetical protein [Helicobacter phage Pt21299RU]                     | $5.00 \times 10^{-146}$<br>(78.11%)  | -     |
| 35 | 29549 | 30412 | 287 | 32.54 | 5.61  | Structural protein                 | putative transcriptional regulator protein [Helicobacter phage phiHP33] | $2.00 \times 10^{-176}$<br>(94.59%)  | -     |
| 36 | 30491 | 30805 | 104 | 11.8  | 8.9   | Hypothetical protein               | -                                                                       | -                                    | -     |

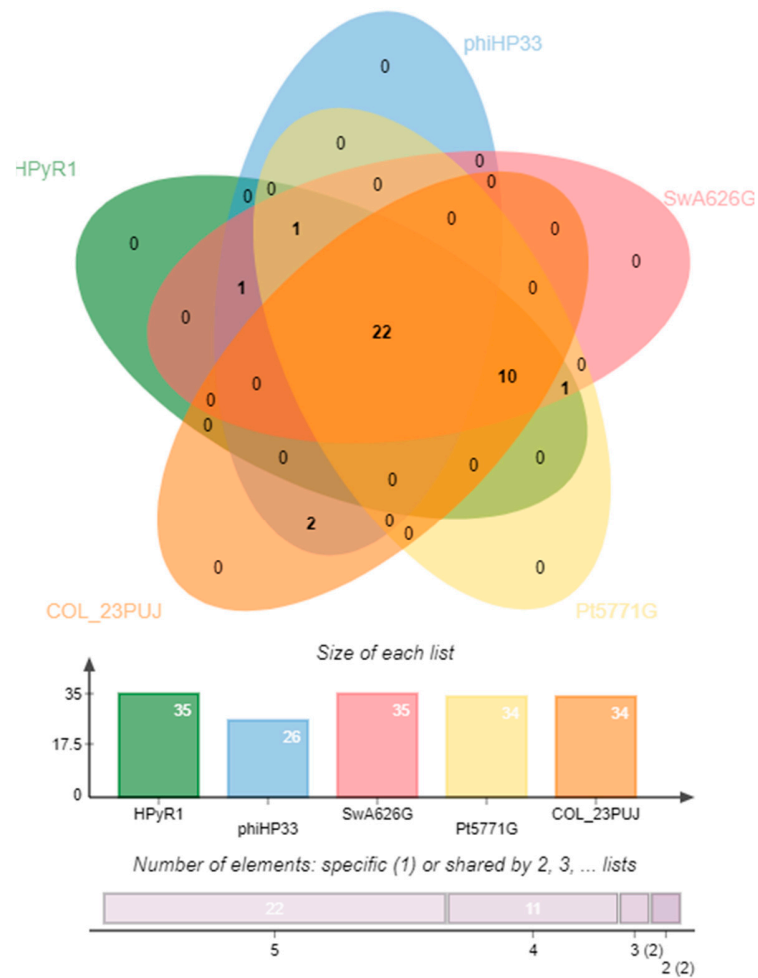

**Figure S1.** OrthoVenn comparison of HPy1R gene products with those of its close related phage genomes deposited at the NCBI. Venn diagram showing the number of orthologous clusters shared between the HPy1R genome and its closest related phages.
